# Supplementary material for: Silver Nanowire Transparent Conductive Electrodes for High-Efficiency III-Nitride Light-Emitting Diodes
Source: PubMed Central journal article supplement (PMC4558582; doi:10.1038/srep13483), 2015-09-03
Supplement: srep13483-s1.pdf [file srep13483-s1.pdf]

# Silver Nanowire Transparent Conductive Electrodes for High-Efficiency III-Nitride Light-Emitting Diodes

Munsik Oh<sup>1</sup>, Won-Yong Jin<sup>2</sup>, Hyeon Jun Jeong<sup>3</sup>, Mun Seok Jeong<sup>3</sup>, Jae-Wook Kang<sup>2</sup>, and Hyunsoo Kim<sup>1</sup>

<sup>1</sup>*School of Semiconductor and Chemical Engineering, Semiconductor Physics Research Center, Chonbuk National University, Jeonju 561-756, Republic of Korea.* <sup>2</sup>*School of Flexible and Printable Electronics, Polymer Materials Fusion Research Center, Chonbuk National University, Jeonju 561-756, Republic of Korea.* <sup>3</sup>*Center of Integrated Nanostructure Physics, Institute for Basic Science, Sungkyunkwan University, Suwon 440-746, Republic of Korea.* Correspondence and requests for materials should be addressed to J.-W. K. (email: jwkang@jbnu.ac.kr) and H. K. (email: hskim7@jbnu.ac.kr).

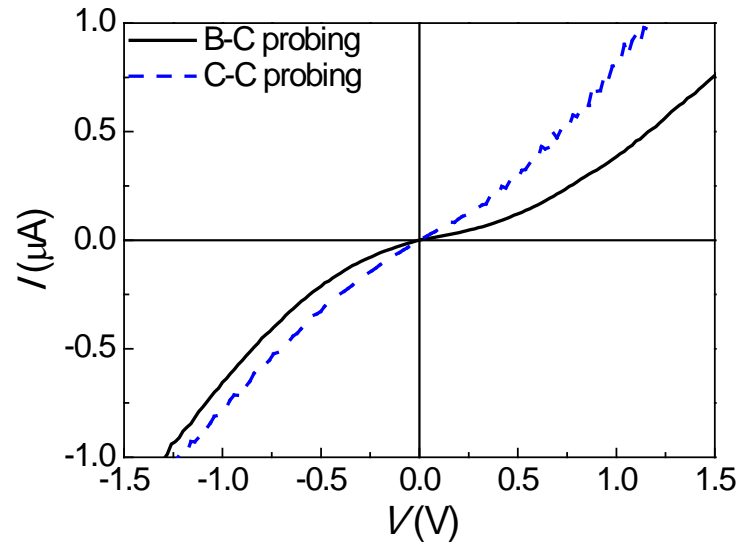

**Supplementary Figure 1 Probing-position-dependent  $I$ - $V$  curves of AgNW films.**

With a constant probing distance of approximately  $80 \mu\text{m}$ , the  $I$ - $V$  curve obtained by probing only the C region was steeper than that obtained by probing both the B and C regions. This indicates that the electrical conductivity of the AgNWs might be degraded due to the use of an overlying structure, where the AgNWs at the boundary region of the  $p$ -GaN window and the  $30 \text{ nm}$ -thick probing pads might be disconnected due to the height difference.

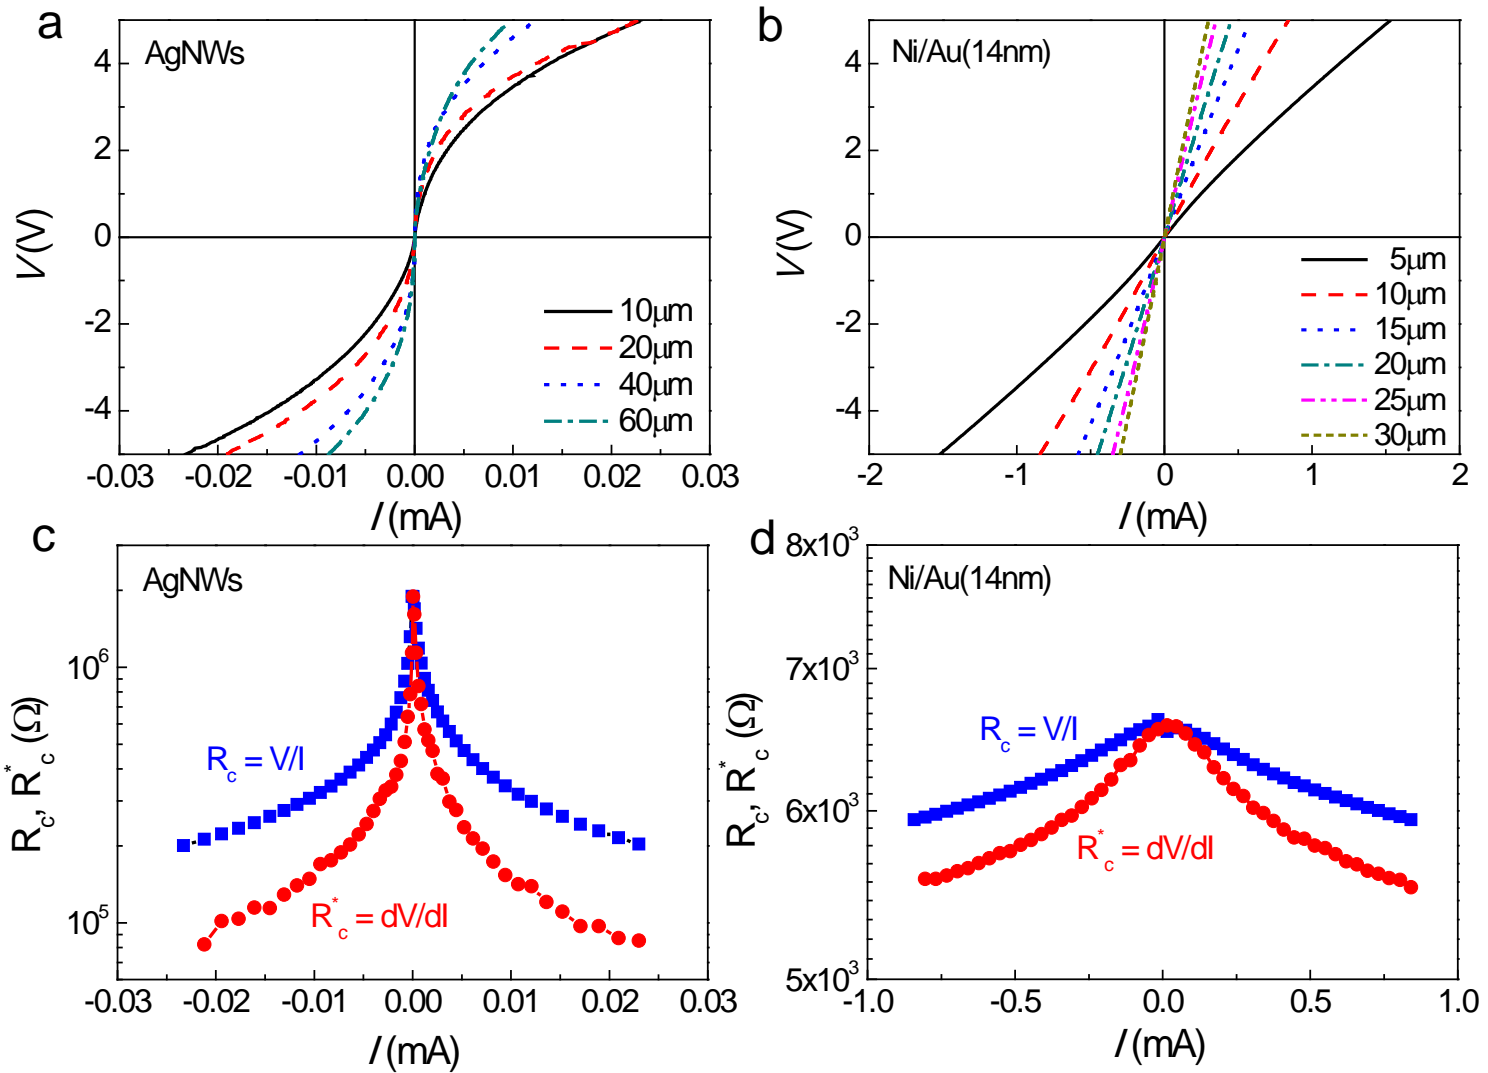

**Supplementary Figure 2  $V$ - $I$  curves and  $R_c$ ,  $R_c^*$ - $I$  curves of AgNWs and Ni/Au contacts**

Supplementary Figure 2a and 2b show the  $V$ - $I$  curves of AgNWs and Ni/Au contacts, exhibiting a non-linearity at zero currents. Supplementary Figure 2c and 2d show the  $R_c$  and  $R_c^*$  plots of AgNWs and Ni/Au contacts, as calculated from the relation of  $R_c = V/I_0$  and  $R_c^* = dV/dI_0$ , where  $I_0$  is the total current flowing from metal pad to sample layer. Using the obtained  $R_c$  and  $R_c^*$  values, the bias-voltage-dependent contact resistance  $\rho_{sc}$  (V) can be obtained according to  $\rho_{sc}$  (V) =  $aR_cR_c^*/\rho_s$ , where  $a$  is the width of TLM pattern and  $\rho_s$  is the specific resistivity of semiconductor.

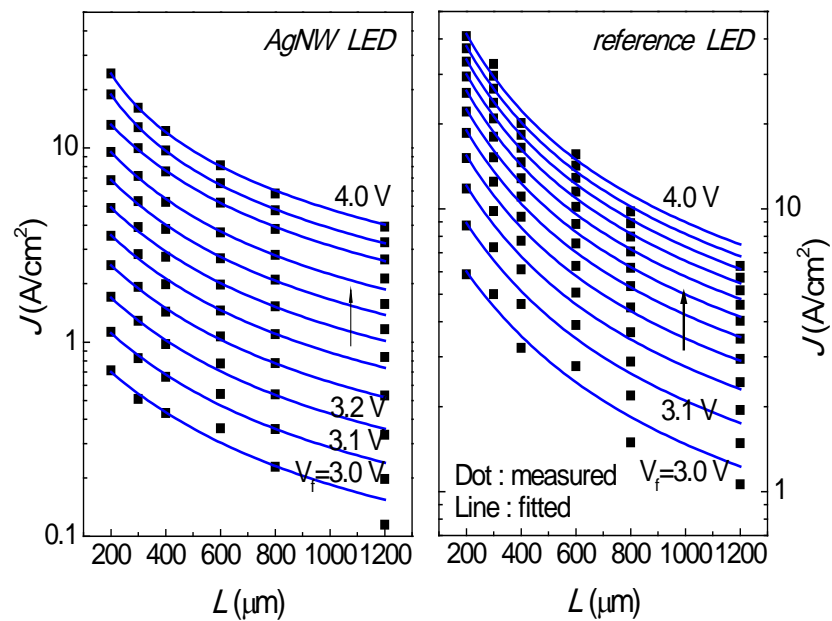

**Supplementary Figure 3  $J$ – $L$  characteristics of both LEDs as a function of the bias voltage**

The current spreading length ( $L_s$ ) can be obtained by theoretical fitting (shown as blue lines in above figures) of the experimental  $J$ – $L$  data (dots) using the following equation of  $J(L)=J_0(L/L_s)-1[1-\exp(-L/L_s)]$ , where  $J_0$  is the current density at the mesa edge.

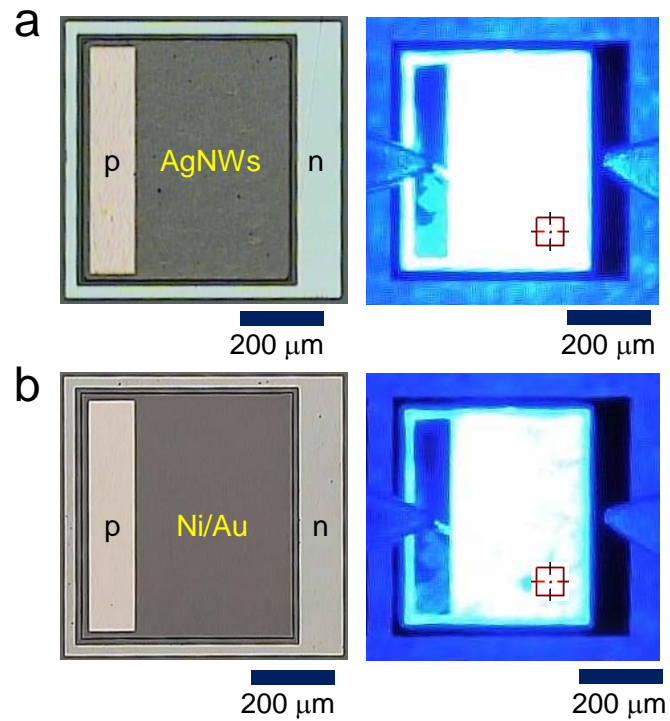

**Supplementary Figure 4 EL images of AgNW-LEDs (a) and reference LEDs (b)**

The EL images of standard LED structure with surrounding *n*-electrodes are shown (taken at 10 mA). The dimension of the mesa was 400 μm×500 μm. Despite the use of surrounding *n*-electrodes, the reference LEDs show still current crowding nearby *n*-electrodes, while the AgNWs LEDs show perfect current spreading.

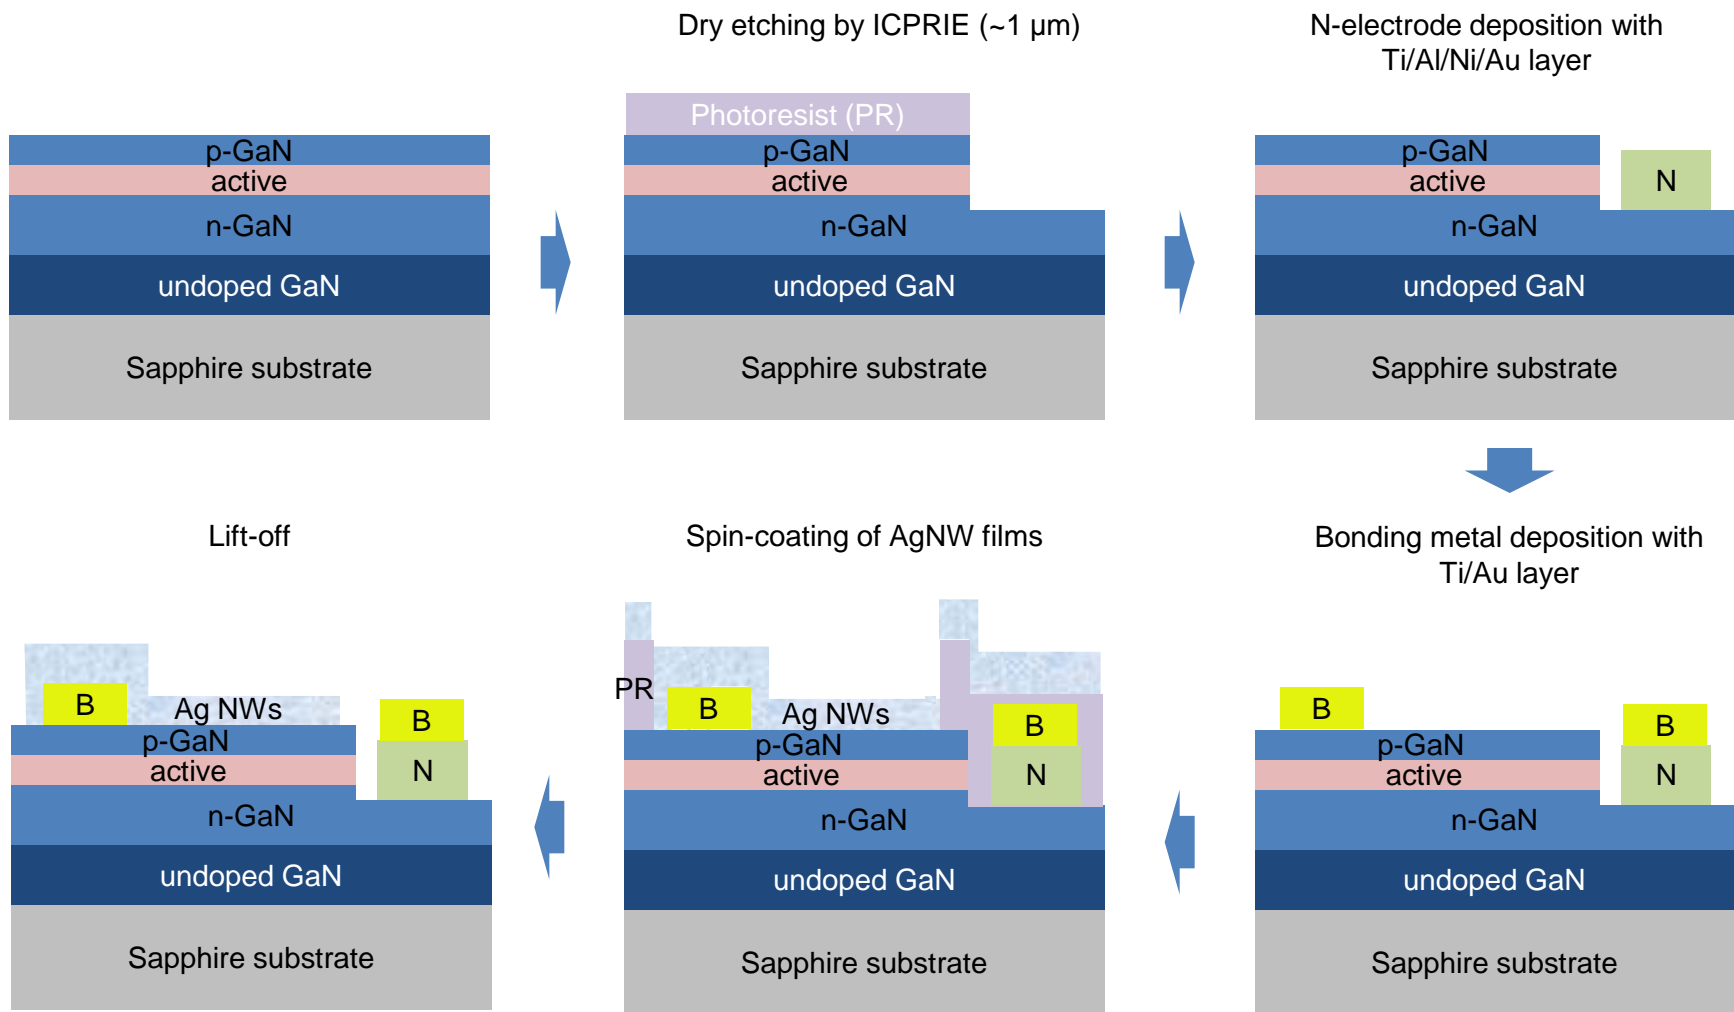

**Supplementary Figure 5 Schematic fabrication procedure for LEDs with AgNWs TCEs**

To fabricate LEDs with AgNW TCEs, the same method was used as that used to form the AgNW TLM pattern. For example, the rectangular mesa was defined by dry etching to a thickness of  $\sim 1.0 \mu\text{m}$  to expose the *n*-layer using an inductively coupled plasma reactive ion etching system, on which a Ti/Al/Ni/Au (30/70/30/70 nm) layer was deposited as an *n*-electrode by an *e*-beam evaporator. Rapid thermal annealing was performed at  $550^\circ\text{C}$  for 1 min in ambient  $\text{N}_2$  to form an *n*-type ohmic contact. To form AgNW TCEs on the *p*-layer, first a Ti/Au (20 nm/10 nm) probing pad was formed on the mesa, followed by selective AgNW coating on the exposed *p*-layer and Ti/Au probing pads by means of a lift-off technique. It is noteworthy that the spin-coating process was performed in the last process step, which minimized possible contamination of AgNWs by additional photolithographic processing.
